# Supplementary material
Source: PubMed Central journal article supplement (PMC8097499)
Supplement: jama-e214542-s003.pdf [file jama-e214542-s003.pdf]

## Data Sharing Statement

Lillegraven. Effect of Half-Dose vs Stable-Dose Conventional Synthetic Disease-Modifying Antirheumatic Drugs on Disease Flares in Patients With Rheumatoid Arthritis In Remission. *JAMA*. Published May 04, 2021. doi:10.1001/jama.2021.4542

### Data

**Data available:** Yes

**Data types:** Deidentified participant data

**How to access data:** A request for data can be sent to the corresponding author, Siri Lillegraven. [siri.lillegraven@gmail.com](mailto:siri.lillegraven@gmail.com)

**When available:** With publication

### Supporting Documents

**Document types:** None

### Additional Information

**Who can access the data:** A de-identified patient data set can be made available to researchers upon reasonable request. The data will only be made available after submission of a project plan outlining the reason for the request and any proposed analyses, and will have to be approved by the ARCTIC REWIND project group.

**Types of analyses:** For a specified purpose

**Mechanisms of data availability:** With a signed data access agreement
